# Supplementary material for: Plasma protein corona on silica nanoparticles enhances exocytosis
Source: Royal Society of Chemistry journal article supplement (doi:10.1039/d4bm01189a), 2025-01-01
Supplement: d4bm01189a2.pdf [file d4bm01189a2.pdf]

## Supporting Information

**Title: Preformed protein corona on silica nanoparticles enhances exocytosis**

*Laura Dietz<sup>†</sup>, Julia Simon<sup>†</sup>, Kai Speth<sup>†</sup>, Katharina Landfester,<sup>\*</sup> Volker Mailänder<sup>\*</sup>*

Laura Dietz, Julia Simon, Kai Speth, Katharina Landfester, Volker Mailänder  
Max Planck Institute for Polymer Research, Ackermannweg 10, 55128 Mainz, Germany  
E-mail: [landfester@mpip-mainz.mpg.de](mailto:landfester@mpip-mainz.mpg.de); [mailaender@mpip-mainz.mpg.de](mailto:mailaender@mpip-mainz.mpg.de)

Laura Dietz, Julia Simon, Kai Speth, Volker Mailänder  
Department of Dermatology, University Medical Center Mainz, Langenbeckstraße 1, 55131  
Mainz, Germany

<sup>†</sup> Shared first author

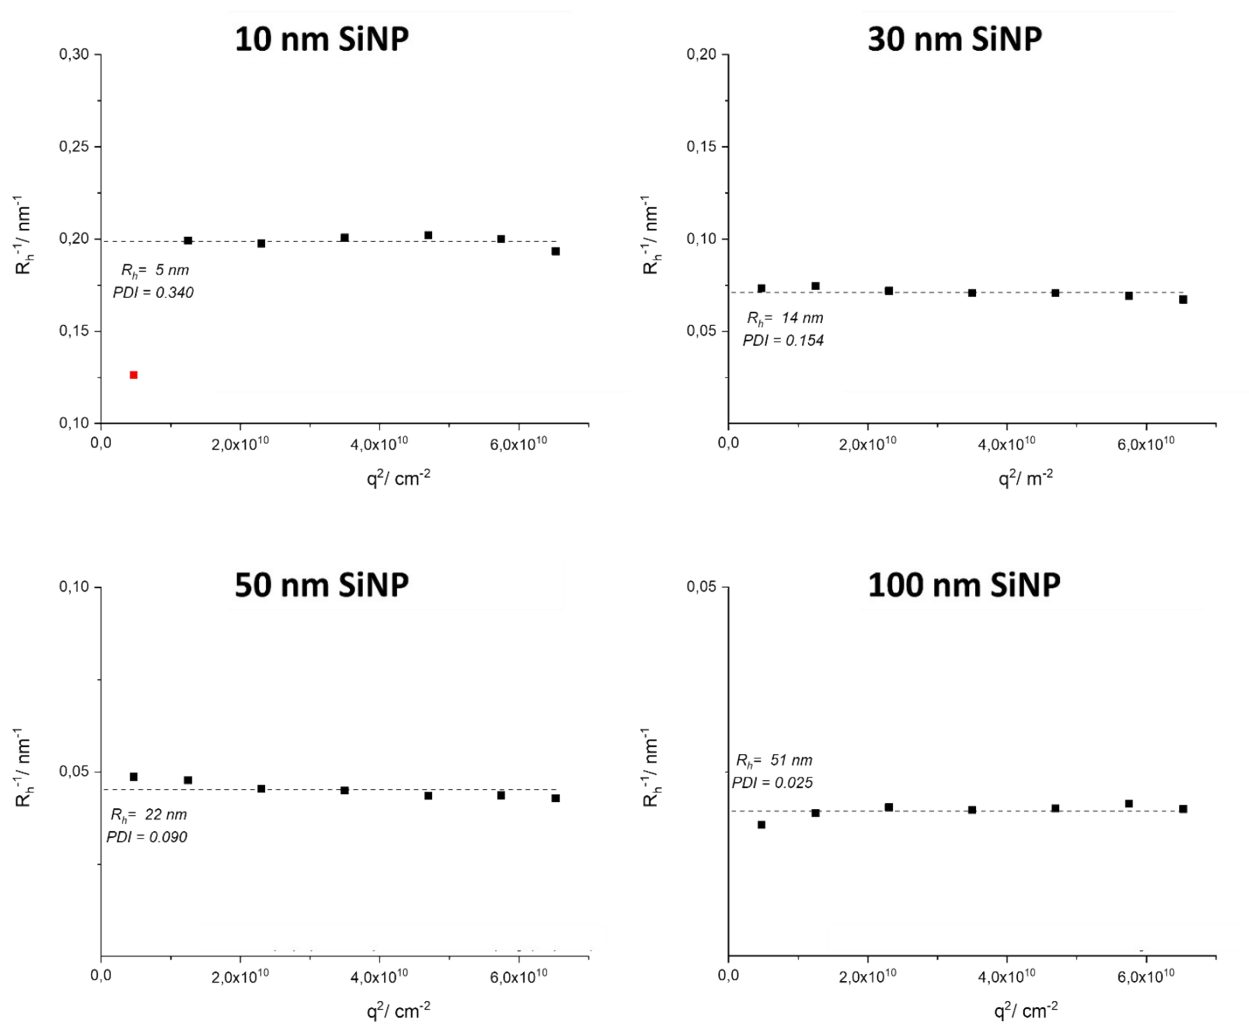

**Figure S1.** Hydrodynamic radii of SiNPs determined by multi-angle DLS in water at 20°C. The PDI was derived from 90° measurements. The red data point was not taken into account for analysis.

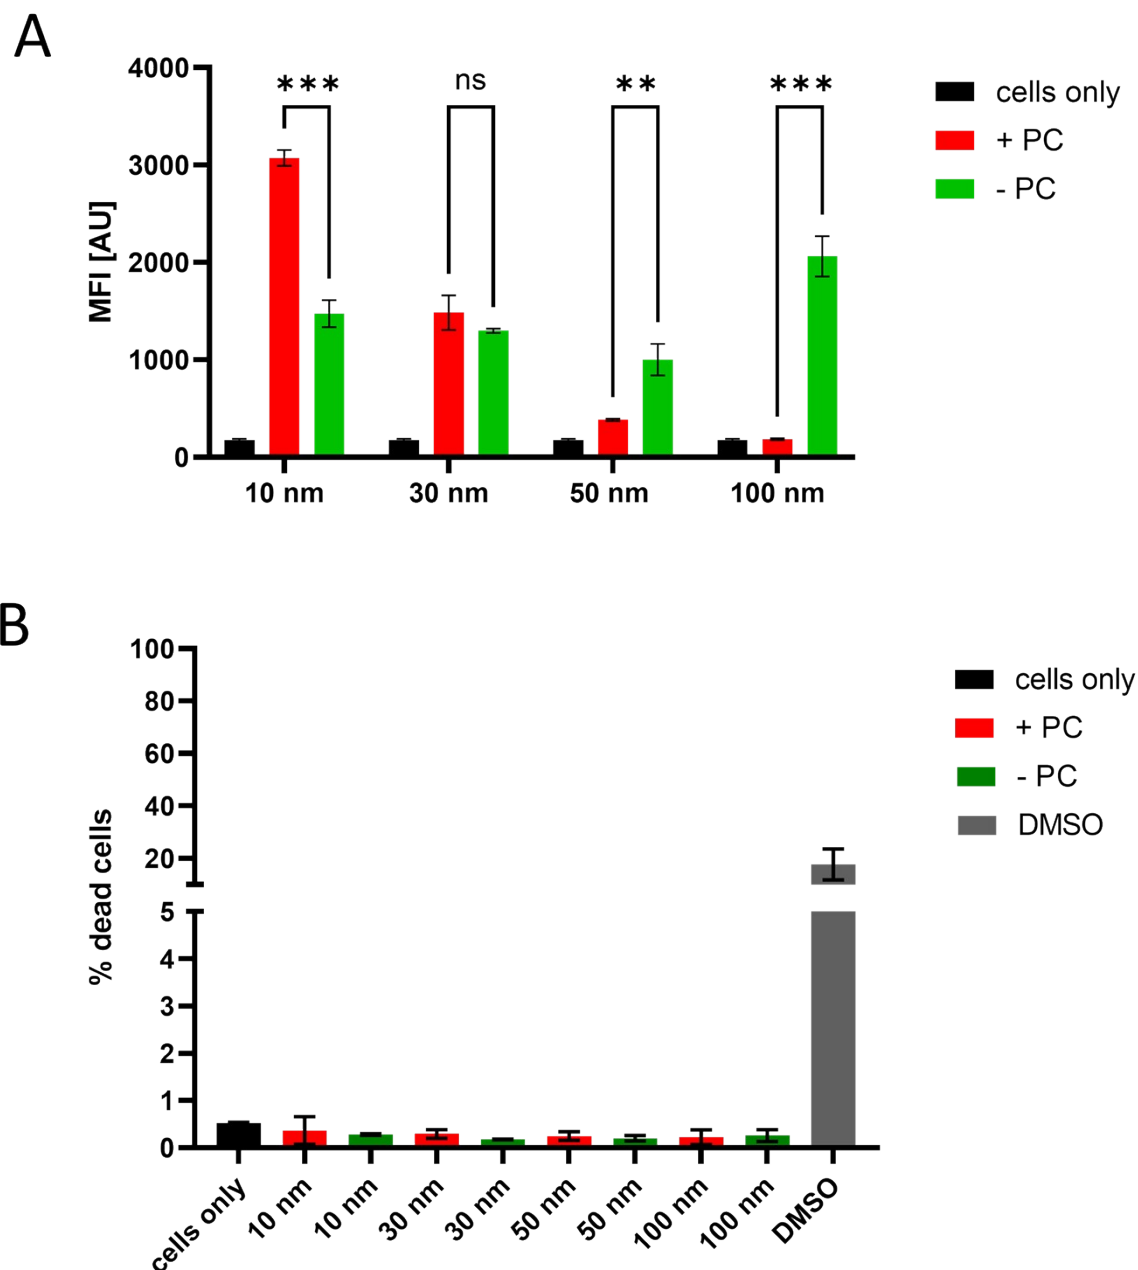

**Figure S2.** Uptake of different-sized SiNPs in the presence and absence of a protein corona (PC). A Flow cytometry measurement of 10 nm, 30 nm, 50 nm, and 100 nm SiNPs uptake in HCT 116 cells after 2 h of incubation. Shown are the means and standard deviations of the MFI of all cells. For statistical analysis, multiple unpaired t tests were performed. ns = not significant, \*\*  $p < 0.002$ , \*\*\*  $p < 0.001$  ( $n = 3$ ). B Cell viability after 2 h of incubation with SiNPs in the absence and presence of a protein corona as a percentage of dead cells. Mean and standard deviation of  $n = 3$ .

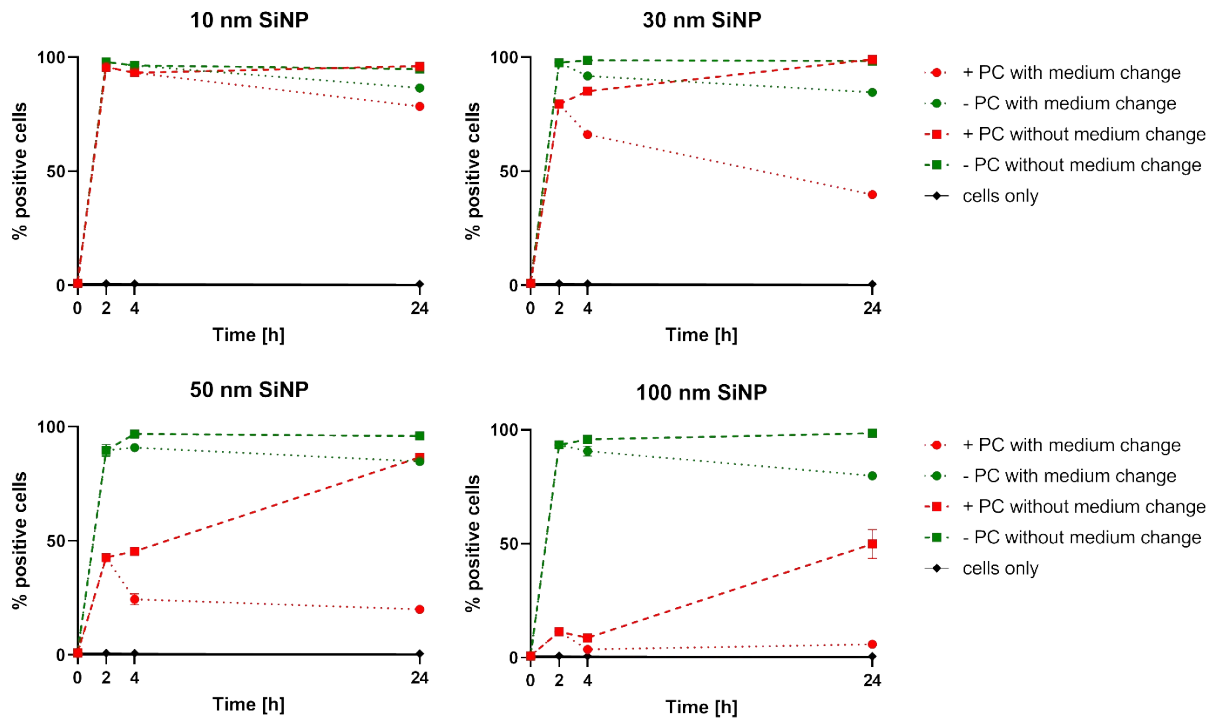

**Figure S3.** Exocytosis of different-sized SiNPs in the presence and absence of a protein corona. HCT 116 cells were incubated with SiNPs with or without pre-adsorbed protein corona for 2 h. Subsequently, the SiNPs were removed and the intracellular particle amount after 4 h and 24 h was measured by flow cytometry. Additionally, cells were incubated with SiNPs for 2 h, 4 h, and 24 h without medium change. The percentage of gated cells is shown. The means and standard deviation of  $n = 3$  are depicted. Lines are guide to the eye only.

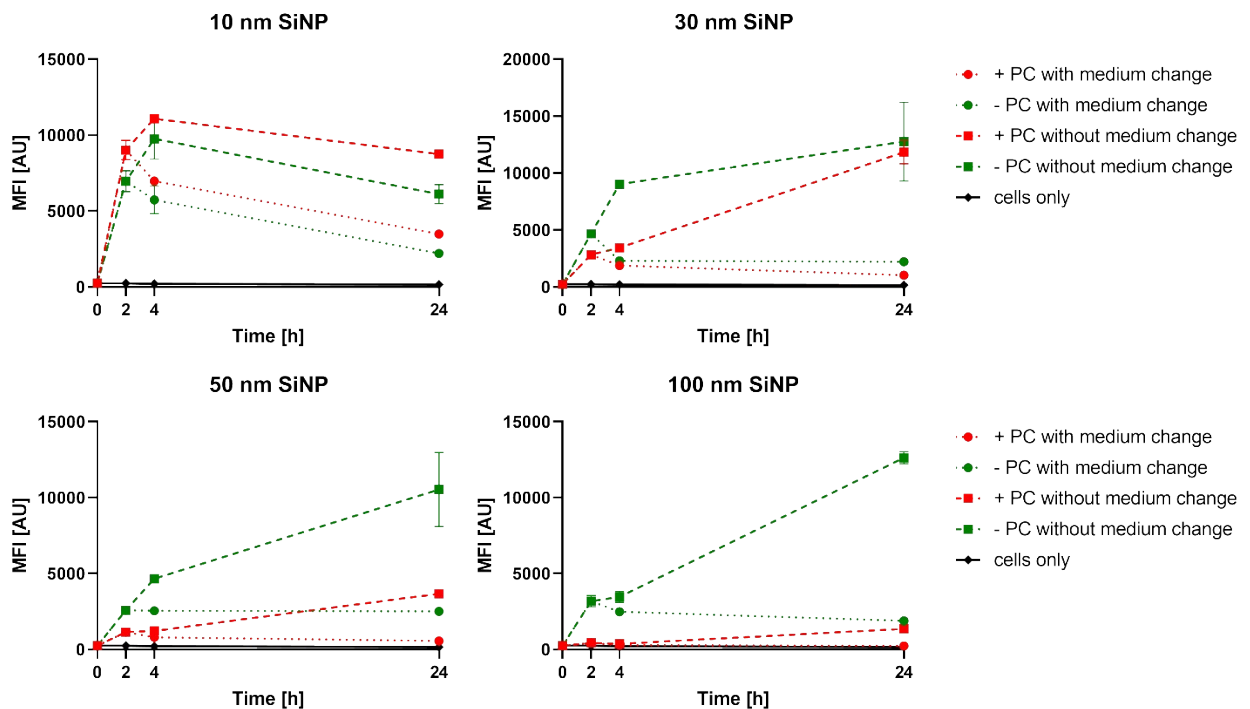

**Figure S4.** Exocytosis of different-sized SiNPs in the presence and absence of a protein corona. HCT 116 cells were incubated with SiNPs with or without pre-adsorbed protein corona for 2 h. Subsequently, the SiNPs were removed and the intracellular particle amount after 4 h and 24 h was measured by flow cytometry. Additionally, cells were incubated with SiNPs for 2 h, 4 h, and 24 h without medium change. Shown are the means and standard deviations of the MFI of all cells ( $n = 3$ ). Lines are guide to the eye only.

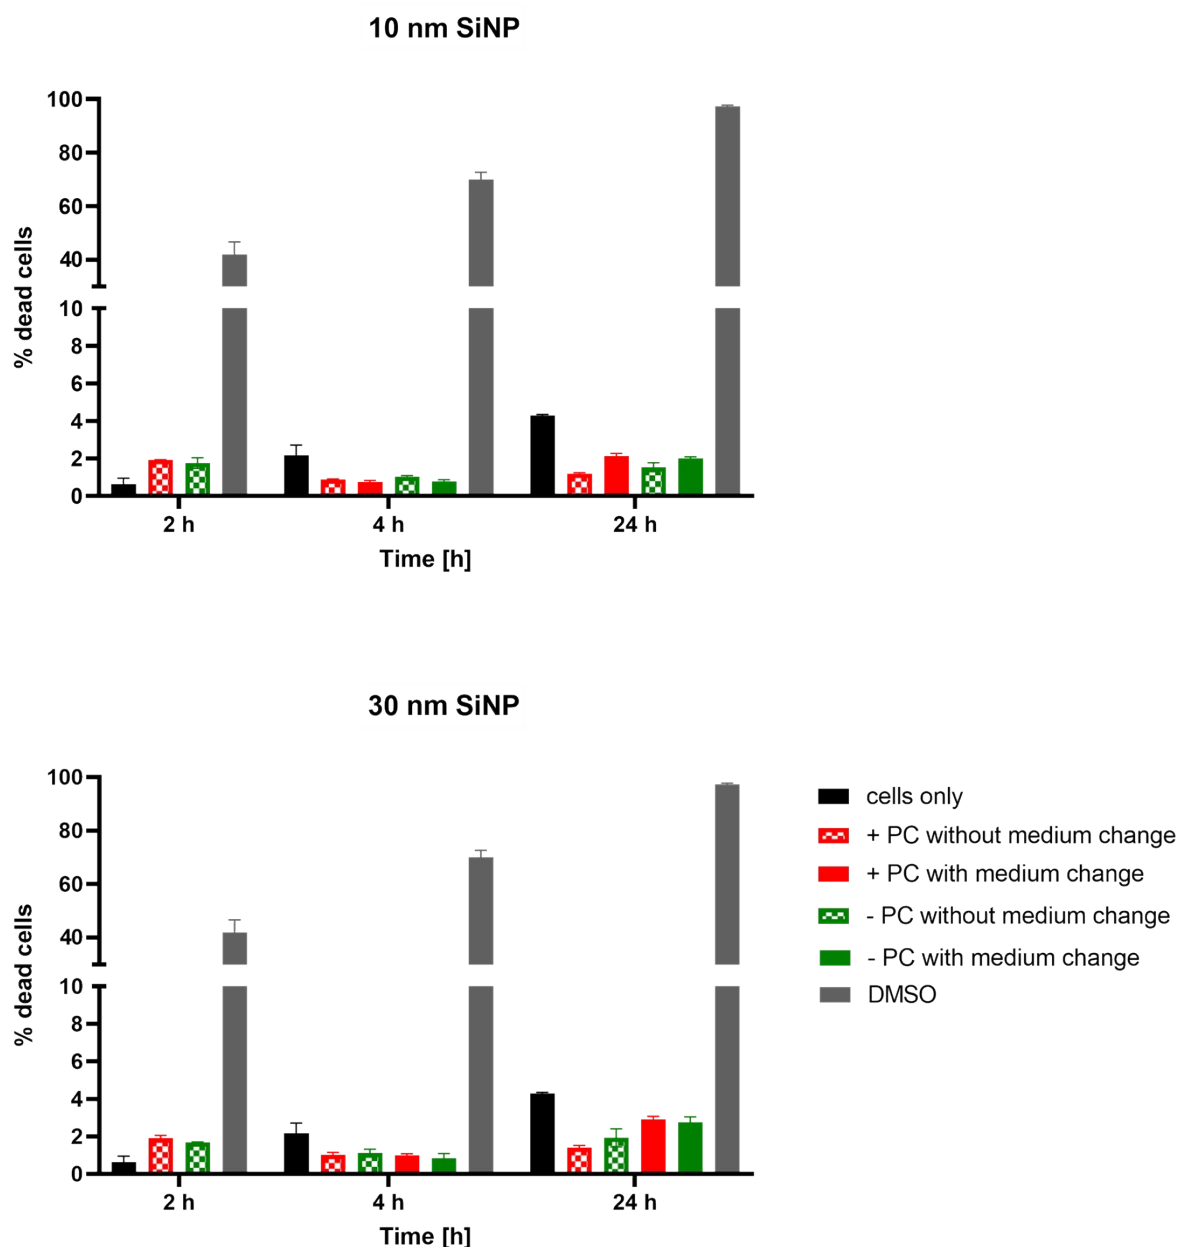

**Figure S5.** Cell viability after incubation of HCT 116 cells with 10 and 30 nm SiNPs in the absence and presence of a protein corona as percentage of dead cells. Mean and standard deviation of  $n = 3$ .

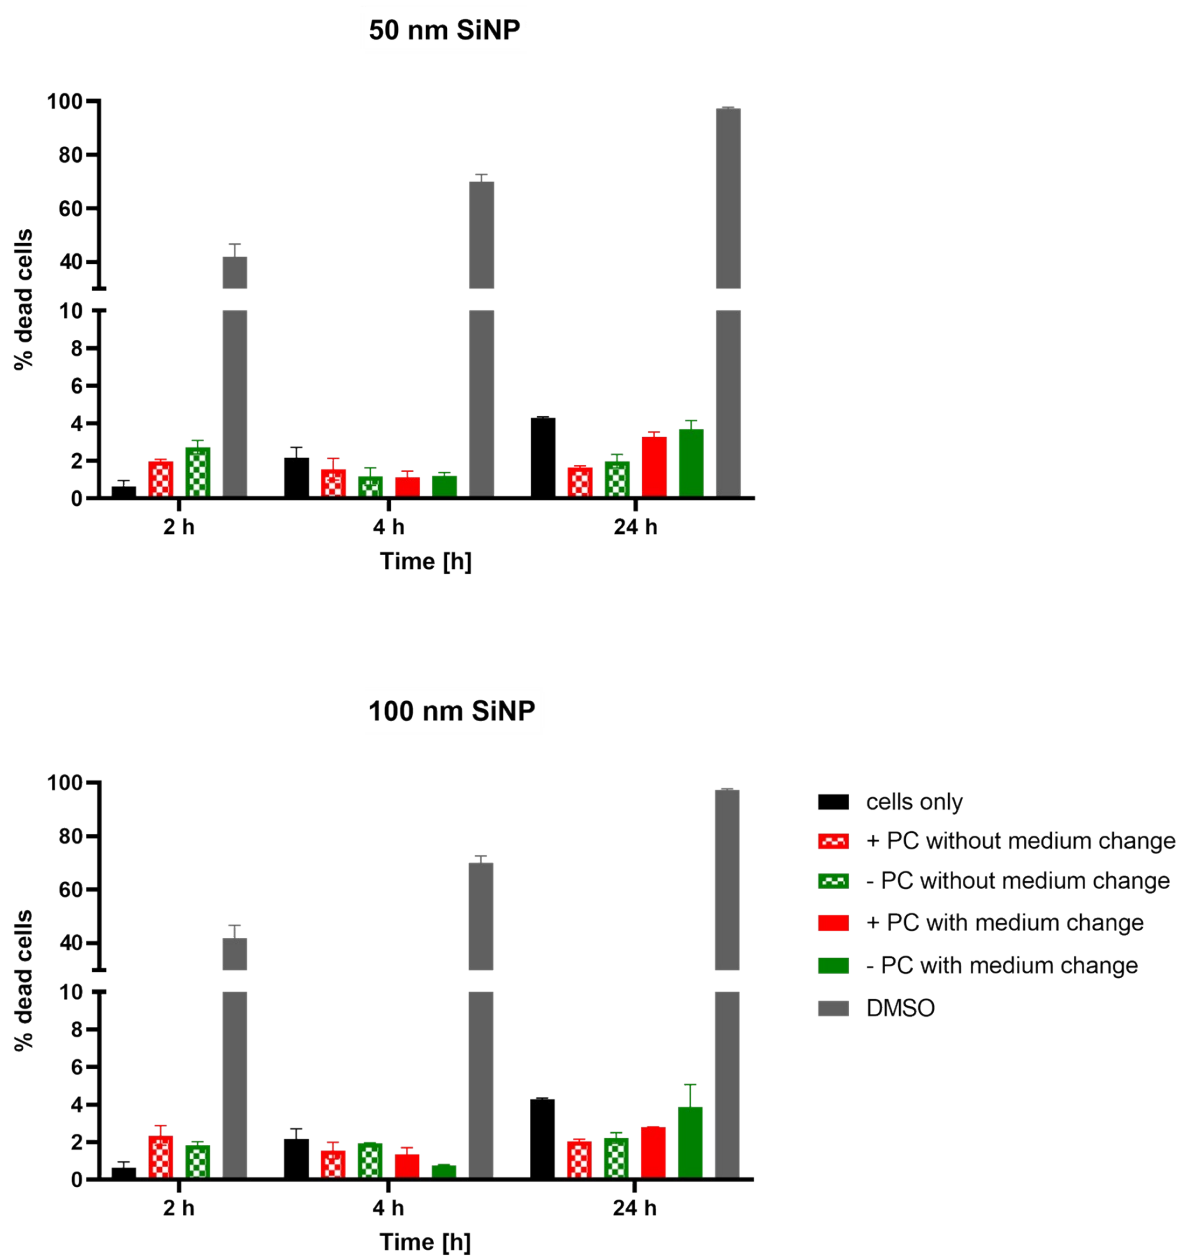

**Figure S6.** Cell viability after incubation of HCT 116 cells with 50 and 100 nm SiNPs in the absence and presence of a protein corona as a percentage of dead cells. Mean and standard deviation of  $n = 3$ .

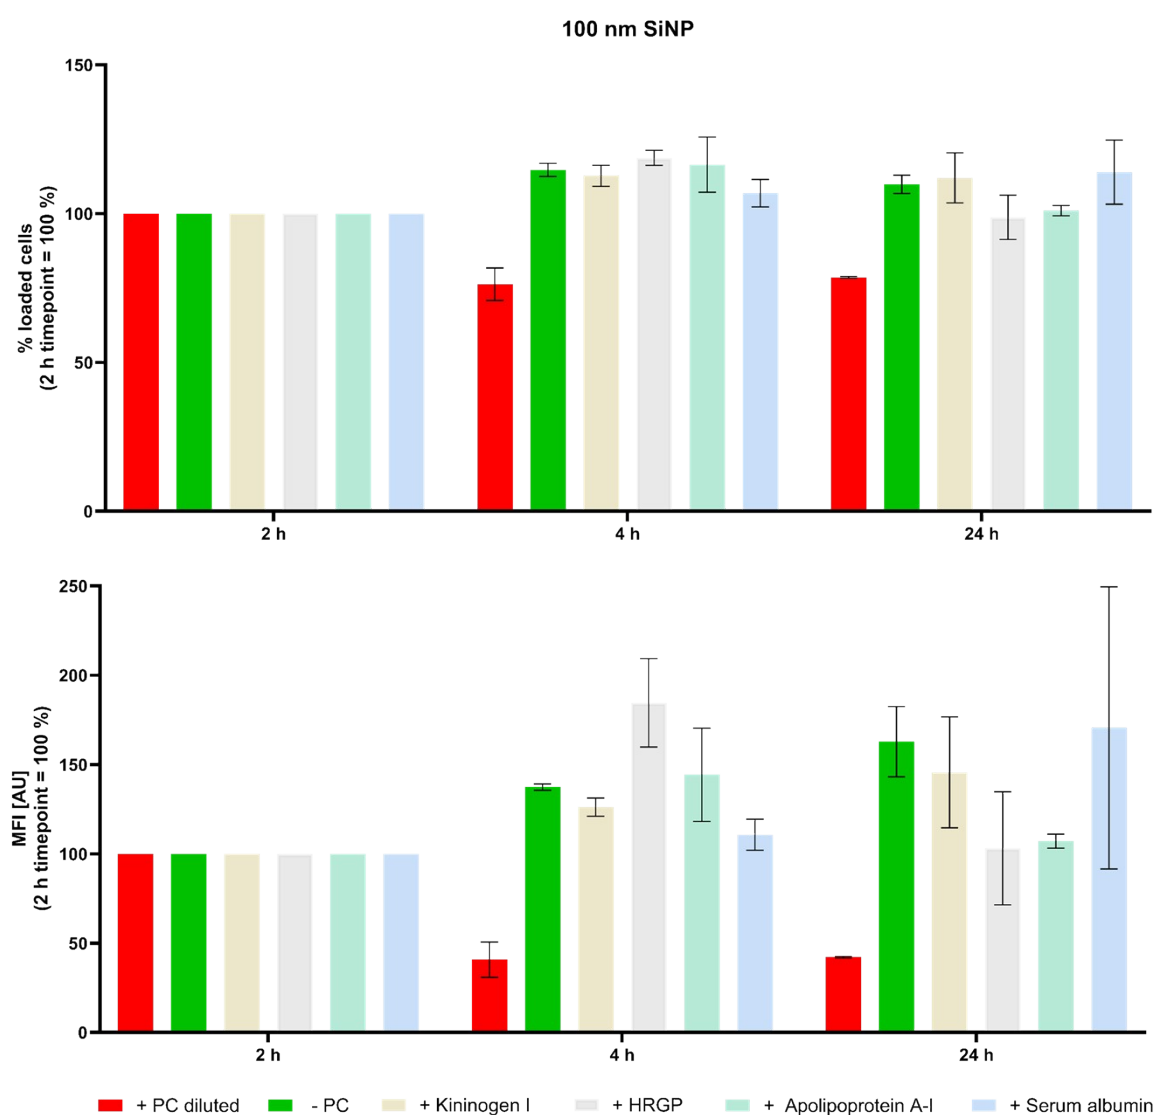

**Figure S7.** Exocytosis of 100 nm SiNPs in the presence and absence of a human plasma protein corona (PC) or different single protein coatings. HCT 116 cells were incubated for 2 h with SiNP with a pre-adsorbed human plasma protein corona, pristine SiNP or SiNP pre-incubated in single protein coating solutions. Here,  $100 \mu\text{g mL}^{-1}$  protein was used for the single protein coating solutions and human plasma was diluted to the same concentration (indicated as + PC diluted). Subsequently, the SiNPs were removed, the cells washed and the remaining intracellular particle amount after 4 h and 24 h was measured by flow cytometry. The percentage of loaded cells relative to the loading after 2 h of particle uptake is shown. The means and standard deviations of  $n = 3$  are depicted.

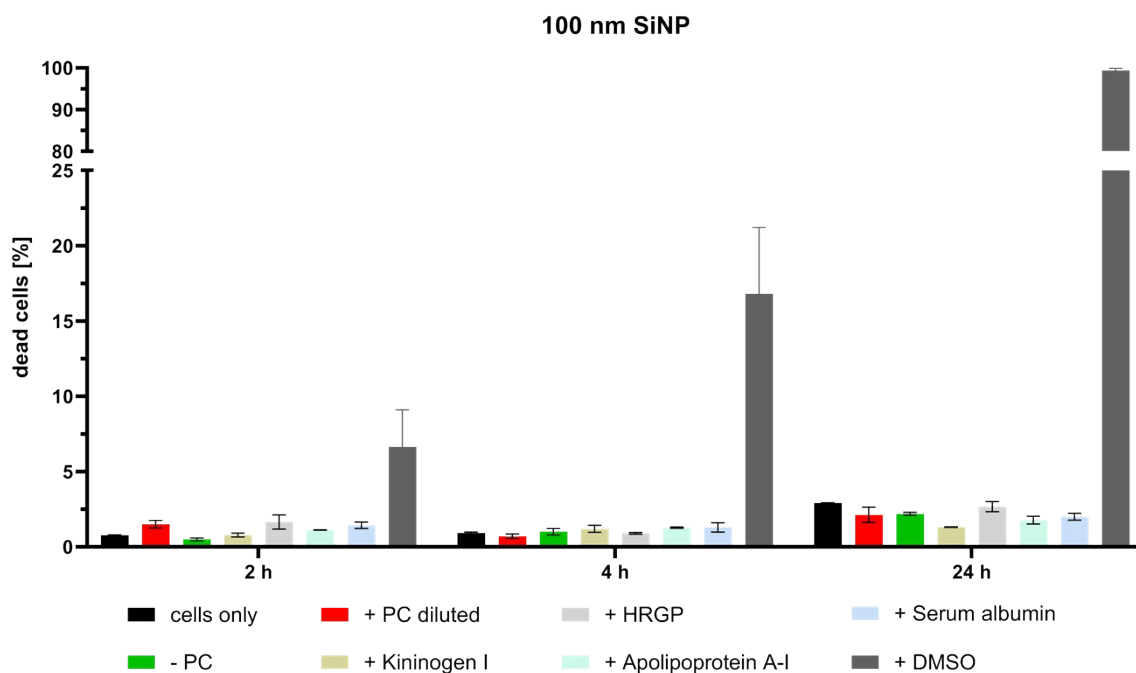

**Figure S8.** Cell viability after incubation of HCT 116 cells with 100 nm SiNPs in the absence and presence of a protein corona or the presence of single protein coatings as indicated as percentage of dead cells. Here,  $100 \mu\text{g mL}^{-1}$  protein was used for the single protein coating solutions and human plasma was diluted to the same concentration (indicated as + PC diluted). Mean and standard deviation of  $n = 3$ .
