# Supplementary material for: Plasma protein corona on silica nanoparticles enhances exocytosis
Source: Royal Society of Chemistry journal article supplement (doi:10.1039/d4bm01189a), 2025-01-01
Supplement: d4bm01189a3.xlsx [file d4bm01189a3.xlsx]

## Sheet: Tabelle1
				protein amount in mean %					standard deviation
				Protein corona (PC) composition of different silica particles
				n = 3	n = 3	n = 3	n = 3
Accession	Peptide count	Unique peptides	Description	10 nm Silica PC	30 nm Silica PC	50 nm Silica PC	100 nm Silica PC		10 nm Silica PC	30 nm Silica PC	50 nm Silica PC	100 nm Silica PC
P02768	59	58	Albumin OS=Homo sapiens OX=9606 GN=ALB PE=1 SV=2	8.56001	5.58754	8.49559	14.1793		1.30483	0.738274	1.40063	4.84224
P02763	2	2	Alpha-1-acid glycoprotein 1 OS=Homo sapiens OX=9606 GN=ORM1 PE=1 SV=2	0.0188528	0.010315	0.0146873	0.0409839		0.00997304	0.00405051	0.00716753	0.0246135
P08697	3	3	Alpha-2-antiplasmin OS=Homo sapiens OX=9606 GN=SERPINF2 PE=1 SV=3	0.0564342	0.0398484	0.0564128	0.0815792		0.00851179	0.00541271	0.0184035	0.0207259
P02765	3	3	Alpha-2-HS-glycoprotein OS=Homo sapiens OX=9606 GN=AHSG PE=1 SV=2	0.047939	0.0260851	0.075871	0.472998		0.00318233	0.00456676	0.0064979	0.320647
P01023	28	26	Alpha-2-macroglobulin OS=Homo sapiens OX=9606 GN=A2M PE=1 SV=3	1.30432	2.06305	3.18773	2.70703		0.221654	0.299903	0.513821	0.749121
P02647	38	35	Apolipoprotein A-I OS=Homo sapiens OX=9606 GN=APOA1 PE=1 SV=1	36.8296	24.2941	15.1869	2.76549		1.38631	2.84895	1.99881	1.08428
P02652	2	2	Apolipoprotein A-II OS=Homo sapiens OX=9606 GN=APOA2 PE=1 SV=1	0.0703947	0.0356571	0.0230053	0.045718		0.0291749	0.0132939	0.00173637	0.020929
P06727	12	11	Apolipoprotein A-IV OS=Homo sapiens OX=9606 GN=APOA4 PE=1 SV=4	0.164691	0.160181	0.100841	1.25495		0.0141393	0.0218896	0.0237338	0.270608
P04114	278	263	Apolipoprotein B-100 OS=Homo sapiens OX=9606 GN=APOB PE=1 SV=2	9.33028	3.04768	1.82985	1.59808		1.4622	0.632045	0.216413	0.689966
P02656	3	2	Apolipoprotein C-III OS=Homo sapiens OX=9606 GN=APOC3 PE=1 SV=1	0.291344	0.259172	0.354501	2.1543		0.0158789	0.0322523	0.0494706	2.21407
P05090	7	7	Apolipoprotein D OS=Homo sapiens OX=9606 GN=APOD PE=1 SV=1	1.10483	0.499585	0.406594	0.253768		0.150611	0.108564	0.0396702	0.0865015
P02649	31	30	Apolipoprotein E OS=Homo sapiens OX=9606 GN=APOE PE=1 SV=1	5.82756	6.95943	3.67719	0.566753		0.834382	1.54358	0.803349	0.10685
O14791	6	3	Apolipoprotein L1 OS=Homo sapiens OX=9606 GN=APOL1 PE=1 SV=5	0.17504	0.123515	0.0829947	0.0809427		0.0114935	0.00620031	0.00703328	0.0136882
O95445	4	4	Apolipoprotein M OS=Homo sapiens OX=9606 GN=APOM PE=1 SV=2	0.24938	0.0818523	0.0531408	0.0398456		0.0304275	0.0103445	0.00693293	0.0129264
P08519	17	16	Apolipoprotein(a) OS=Homo sapiens OX=9606 GN=LPA PE=1 SV=2	0.335567	0.132226	0.125177	0.140399		0.0698545	0.0215438	0.00910167	0.0387438
P04003	12	8	C4b-binding protein alpha chain OS=Homo sapiens OX=9606 GN=C4BPA PE=1 SV=2	0.114794	0.100598	0.148282	0.0696907		0.0162753	0.01583	0.0257272	0.0318876
Q9NQ79	10	8	Cartilage acidic protein 1 OS=Homo sapiens OX=9606 GN=CRTAC1 PE=1 SV=2	0.0659181	0.0909311	0.105911	0.108574		0.00518385	0.0101226	0.00421215	0.0831939
P49913	3	3	Cathelicidin antimicrobial peptide OS=Homo sapiens OX=9606 GN=CAMP PE=1 SV=1	0.162997	0.220552	0.221486	0.583052		0.0432728	0.0434434	0.00148303	0.277872
O43866	8	7	CD5 antigen-like OS=Homo sapiens OX=9606 GN=CD5L PE=1 SV=1	0.0151088	0.0231868	0.0330584	0.0544126		0.00332261	0.00321386	0.00590206	0.0419709
Q5VT06	5	3	Centrosome-associated protein 350 OS=Homo sapiens OX=9606 GN=CEP350 PE=1 SV=1	0.204881	0.121839	0.158468	0.263365		0.00997945	0.0113582	0.0120005	0.0710737
P10909	7	6	Clusterin OS=Homo sapiens OX=9606 GN=CLU PE=1 SV=1	0.348091	0.602618	0.390924	0.574319		0.0470568	0.120381	0.0484009	0.202757
P03951	37	35	Coagulation factor XI OS=Homo sapiens OX=9606 GN=F11 PE=1 SV=1	0.762489	1.20622	1.51053	1.74347		0.0617037	0.170744	0.0373639	0.486776
P00748	10	8	Coagulation factor XII OS=Homo sapiens OX=9606 GN=F12 PE=1 SV=3	0.178645	1.42146	0.977692	0.217504		0.0305741	0.110227	0.0774756	0.0677888
P02452	8	7	Collagen alpha-1(I) chain OS=Homo sapiens OX=9606 GN=COL1A1 PE=1 SV=6	0.450997	0.24955	0.493509	2.90141		0.0741676	0.0369409	0.083746	0.619518
P01024	8	8	Complement C3 OS=Homo sapiens OX=9606 GN=C3 PE=1 SV=2	0.0694832	0.102893	0.155962	0.100241		0.00490285	0.0131302	0.0167093	0.0572662
Q14204	26	22	Cytoplasmic dynein 1 heavy chain 1 OS=Homo sapiens OX=9606 GN=DYNC1H1 PE=1 SV=5	2.38844	0.815022	0.534584	0.901687		0.0648579	0.0482658	0.00708843	0.112075
P02671	21	21	Fibrinogen alpha chain OS=Homo sapiens OX=9606 GN=FGA PE=1 SV=2	0.254976	0.251092	0.277666	0.935105		0.0408346	0.0565014	0.066264	0.992328
P02675	20	17	Fibrinogen beta chain OS=Homo sapiens OX=9606 GN=FGB PE=1 SV=2	0.326861	0.496451	0.50211	0.848391		0.011464	0.0298465	0.0239059	0.622803
P02679	17	15	Fibrinogen gamma chain OS=Homo sapiens OX=9606 GN=FGG PE=1 SV=3	0.436116	0.363088	0.509656	1.62358		0.0326742	0.0224247	0.0511742	0.278036
Q9NW75	3	3	G patch domain-containing protein 2 OS=Homo sapiens OX=9606 GN=GPATCH2 PE=1 SV=1	0.0330554	0.0402957	0.0418614	0.00402574		0.00997205	0.011467	0.00205064	0.00137768
Q08378	4	3	Golgin subfamily A member 3 OS=Homo sapiens OX=9606 GN=GOLGA3 PE=1 SV=2	0.0626883	0.175406	0.314101	0.480614		0.0397329	0.0858203	0.0813879	0.19891
P00738	16	6	Haptoglobin OS=Homo sapiens OX=9606 GN=HP PE=1 SV=1	0.343083	0.134067	0.17646	0.354047		0.114198	0.0134466	0.0166139	0.0556007
P00739	11	3	Haptoglobin-related protein OS=Homo sapiens OX=9606 GN=HPR PE=2 SV=2	0.0570309	0.0734336	0.101655	0.148008		0.00928362	0.0208424	0.0139909	0.0153375
P02790	4	3	Hemopexin OS=Homo sapiens OX=9606 GN=HPX PE=1 SV=2	0.0445686	0.0304697	0.0442541	0.0750513		0.0173024	0.0105506	0.00572682	0.0561132
P04196	31	28	Histidine-rich glycoprotein OS=Homo sapiens OX=9606 GN=HRG PE=1 SV=1	4.88491	11.7447	19.016	32.6665		0.174027	1.19266	0.287444	3.24893
O43719	2	2	HIV Tat-specific factor 1 OS=Homo sapiens OX=9606 GN=HTATSF1 PE=1 SV=1	0.0078126	0.0038618	0.00440154	0.0562508		0.00219579	0.000487988	0.00279747	0.0861071
P01876	11	5	Immunoglobulin heavy constant alpha 1 OS=Homo sapiens OX=9606 GN=IGHA1 PE=1 SV=2	0.210278	0.320769	0.416073	0.210621		0.0809053	0.14301	0.0880921	0.0985135
P01857;P0DOX5	10	4	Immunoglobulin heavy constant gamma 1 OS=Homo sapiens OX=9606 GN=IGHG1 PE=1 SV=1	0.464069	0.353916	0.391362	0.733957		0.167412	0.130976	0.0961841	0.0943798
P01859	11	4	Immunoglobulin heavy constant gamma 2 OS=Homo sapiens OX=9606 GN=IGHG2 PE=1 SV=2	1.96624	1.14431	1.20408	3.43101		0.124709	0.025161	0.111386	2.66631
P01860	12	5	Immunoglobulin heavy constant gamma 3 OS=Homo sapiens OX=9606 GN=IGHG3 PE=1 SV=2	0.927498	0.447316	0.266602	0.279237		0.0179243	0.0262541	0.0190439	0.108765
P01861	8	3	Immunoglobulin heavy constant gamma 4 OS=Homo sapiens OX=9606 GN=IGHG4 PE=1 SV=1	0.118439	0.0672846	0.0632526	0.209779		0.0377192	0.0143018	0.000467124	0.149735
P01871	14	4	Immunoglobulin heavy constant mu OS=Homo sapiens OX=9606 GN=IGHM PE=1 SV=4	0.133242	0.229201	0.304617	0.155857		0.0195495	0.0470257	0.0226491	0.0674823
P01834	7	2	Immunoglobulin kappa constant OS=Homo sapiens OX=9606 GN=IGKC PE=1 SV=2	0.561134	0.484658	0.783165	1.38797		0.0130419	0.0398968	0.0483805	0.122127
P0DOX6	13	3	Immunoglobulin mu heavy chain OS=Homo sapiens OX=9606 PE=1 SV=2	0.215924	0.346803	0.490237	0.272038		0.0109829	0.0660615	0.0672671	0.130776
P35858	9	8	Insulin-like growth factor-binding protein complex acid labile subunit OS=Homo sapiens OX=9606 GN=IGFALS PE=1 SV=1	0.182603	0.759758	1.1291	1.64718		0.0580687	0.255084	0.19832	0.586019
Q14624	15	15	Inter-alpha-trypsin inhibitor heavy chain H4 OS=Homo sapiens OX=9606 GN=ITIH4 PE=1 SV=4	0.0690877	0.142976	0.205535	0.217788		0.025279	0.0447431	0.0182924	0.173633
P01042	38	38	Kininogen-1 OS=Homo sapiens OX=9606 GN=KNG1 PE=1 SV=2	8.05042	20.9614	20.6508	4.90323		2.81457	6.25305	5.36539	0.910004
Q5T700	2	2	Low-density lipoprotein receptor class A domain-containing protein 1 OS=Homo sapiens OX=9606 GN=LDLRAD1 PE=1 SV=1	0.298411	0.521752	0.846687	1.75159		0.108057	0.155183	0.0117431	1.42048
P03952	52	47	Plasma kallikrein OS=Homo sapiens OX=9606 GN=KLKB1 PE=1 SV=1	1.25186	2.96588	4.24786	1.77856		0.0684429	0.0400743	0.63694	0.964211
P05155	18	18	Plasma protease C1 inhibitor OS=Homo sapiens OX=9606 GN=SERPING1 PE=1 SV=2	1.70702	1.51061	1.39057	0.23323		0.116836	0.279759	0.255441	0.0953275
P05154	12	11	Plasma serine protease inhibitor OS=Homo sapiens OX=9606 GN=SERPINA5 PE=1 SV=3	0.125139	0.13521	0.173994	0.172296		0.0155134	0.0215876	0.0161093	0.0336002
P00747;Q02325;Q15195;P35900	44	40	Plasminogen OS=Homo sapiens OX=9606 GN=PLG PE=1 SV=2	0.507066	0.845064	2.40761	6.25464		0.0792258	0.182523	0.381838	0.834611
Q9H8M9	3	2	Protein eva-1 homolog A OS=Homo sapiens OX=9606 GN=EVA1A PE=1 SV=1	0.721422	0.642745	0.599875	2.21779		0.114543	0.112171	0.147204	1.43449
O60248	4	3	Protein SOX-15 OS=Homo sapiens OX=9606 GN=SOX15 PE=1 SV=1	0.0503519	0.0336586	0.0348569	0.0675258		0.0208341	0.0168391	0.00805527	0.0256351
P00734	13	10	Prothrombin OS=Homo sapiens OX=9606 GN=F2 PE=1 SV=2	0.247672	0.492166	0.49465	0.225424		0.0752193	0.0656371	0.123839	0.19146
P49802	2	2	Regulator of G-protein signaling 7 OS=Homo sapiens OX=9606 GN=RGS7 PE=1 SV=3	0.0242409	0.0168956	0.0182469	0.176509		0.00870698	0.00667084	0.00779237	0.199216
Q15413	6	4	Ryanodine receptor 3 OS=Homo sapiens OX=9606 GN=RYR3 PE=1 SV=3	3.69029	2.56816	1.3671	0.574264		1.27645	0.725542	0.125124	0.167605
P49908	11	11	Selenoprotein P OS=Homo sapiens OX=9606 GN=SELENOP PE=1 SV=3	0.713395	1.23963	1.25874	0.257598		0.135142	0.298226	0.176873	0.20881
P02787	21	19	Serotransferrin OS=Homo sapiens OX=9606 GN=TF PE=1 SV=3	0.396388	0.323384	0.275393	0.533798		0.0135906	0.0399744	0.021085	0.282574
P35542	3	3	Serum amyloid A-4 protein OS=Homo sapiens OX=9606 GN=SAA4 PE=1 SV=2	0.415229	0.19269	0.135857	0.21254		0.0222615	0.0129495	0.0136467	0.0312452
P27169	14	14	Serum paraoxonase/arylesterase 1 OS=Homo sapiens OX=9606 GN=PON1 PE=1 SV=3	0.821951	0.897819	0.528277	0.172374		0.135563	0.135407	0.0724394	0.066546
P07996	4	4	Thrombospondin-1 OS=Homo sapiens OX=9606 GN=THBS1 PE=1 SV=2	0.184217	0.076779	0.0620287	0.214529		0.0169431	0.00948099	0.0025374	0.21933
P02766	2	2	Transthyretin OS=Homo sapiens OX=9606 GN=TTR PE=1 SV=1	0.0287175	0.0266482	0.0329733	0.0179461		0.0105088	0.012034	0.0088817	0.0019391
P02774	2	2	Vitamin D-binding protein OS=Homo sapiens OX=9606 GN=GC PE=1 SV=2	0	0	0	0.0804964		0	0	0	0.139043
P04004	11	9	Vitronectin OS=Homo sapiens OX=9606 GN=VTN PE=1 SV=1	0.338491	0.664518	0.831423	0.518754		0.0251492	0.0329601	0.0875637	0.0886278
